# Supplementary material for: Semisynthesis of Betaxanthins from Purified Betacyanin of Opuntia dillenii sp.: Color Stability and Antiradical Capacity
Source: MDPI journal article supplement (doi:10.3390/molecules29092116), 2024-05-03

## l-LeuBx mass spectrum

### <Spectrum>

Line#:1 R.Time:---(Scan#:---)  
MassPeaks:1065  
RawMode:Averaged 0.688-0.692(414-416) BasePeak:206.89336(21754)  
BG Mode:Calc Segment 1 - Event 1

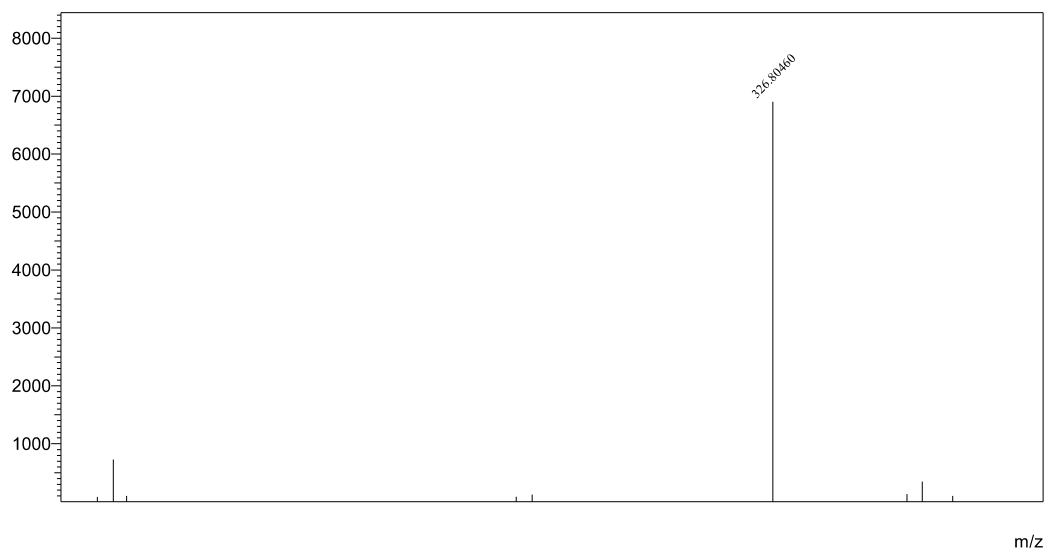

## l-ProBx mass spectrum

### <Spectrum>

Line#:1 R.Time:---(Scan#:---)  
MassPeaks:1574  
RawMode:Averaged 0.790-0.793(475-477) BasePeak:434.12433(30343)  
BG Mode:Calc Segment 1 - Event 1

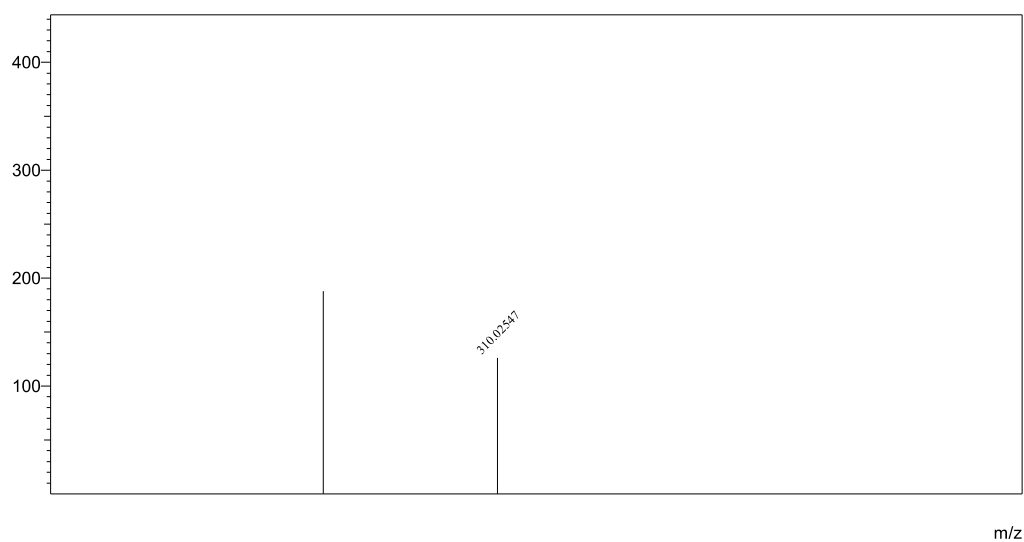

## l-PheBx mass spectrum

### <Spectrum>

Line#:1 R.Time:---(Scan#:---)  
MassPeaks:1390  
RawMode:Averaged 0.710-0.713(427-429) BasePeak:239.22514(270571)  
BG Mode:Calc Segment 1 - Event 1

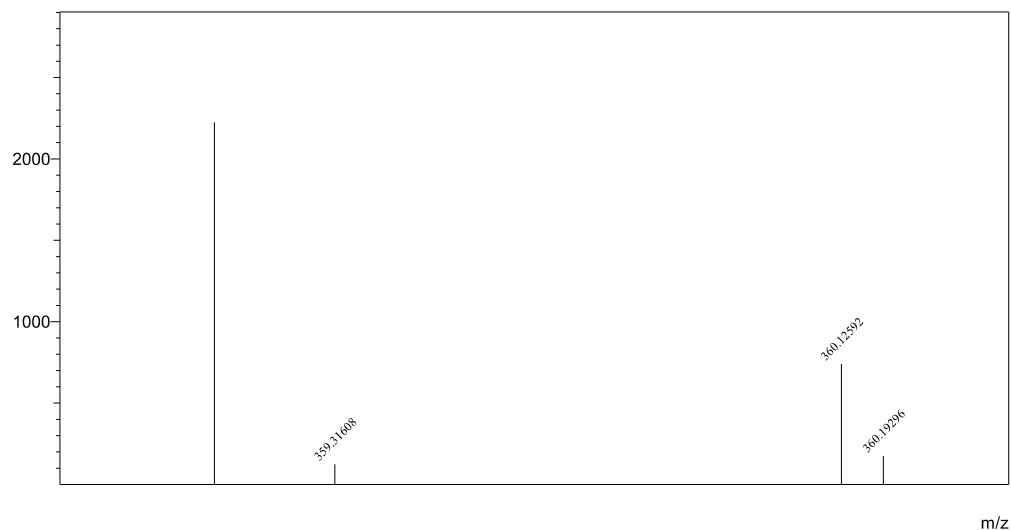

## l-AlaBx mass spectrum

### <Spectrum>

Line#:1 R.Time:---(Scan#:---)  
MassPeaks:2557  
RawMode:Averaged 0.698-0.702(420-422) BasePeak:102.12757(78905)  
BG Mode:Calc Segment 1 - Event 1

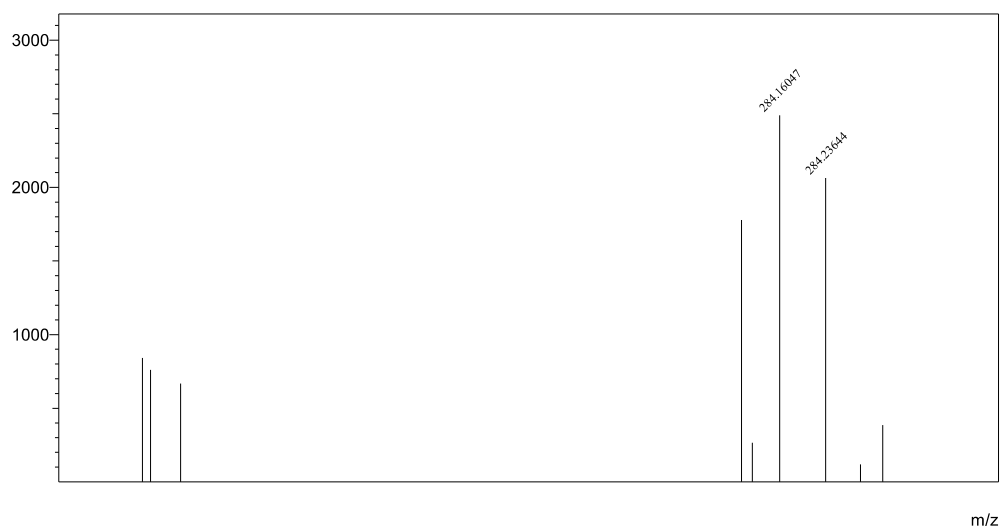

Supplement: s1 [file s1]
